# Supplementary material for: Photoelectrochemical activity of ZnFe2O4modified α-Fe2O3nanorod array films
Source: Royal Society of Chemistry journal article supplement (doi:10.1039/c4ra05289g), 2014-08-11
Supplement: c4ra05289g1.pdf [file c4ra05289g1.pdf]

## Electronic supplementary information (ESI)

### Photoelectrochemical Activity of $\text{ZnFe}_2\text{O}_4$ Modified $\alpha\text{-Fe}_2\text{O}_3$ Nanorod Array Films

Youhong Guo,<sup>a</sup> Yanming Fu,<sup>b</sup> Ya Liu<sup>b</sup>, and Shaohua Shen<sup>b\*</sup>

<sup>a</sup> Department of NanoEngineering, University of California San Diego, 9500 Gilman Dr., La Jolla, California 92093, USA

<sup>b</sup> International Research Center for Renewable Energy, State Key Laboratory of Multiphase Flow in Power Engineering, Xi'an Jiaotong University, 28 Xianning West Road, Xi'an, Shaanxi 710049, China. E-mail: shshen\_xjtu@mail.xjtu.edu.cn

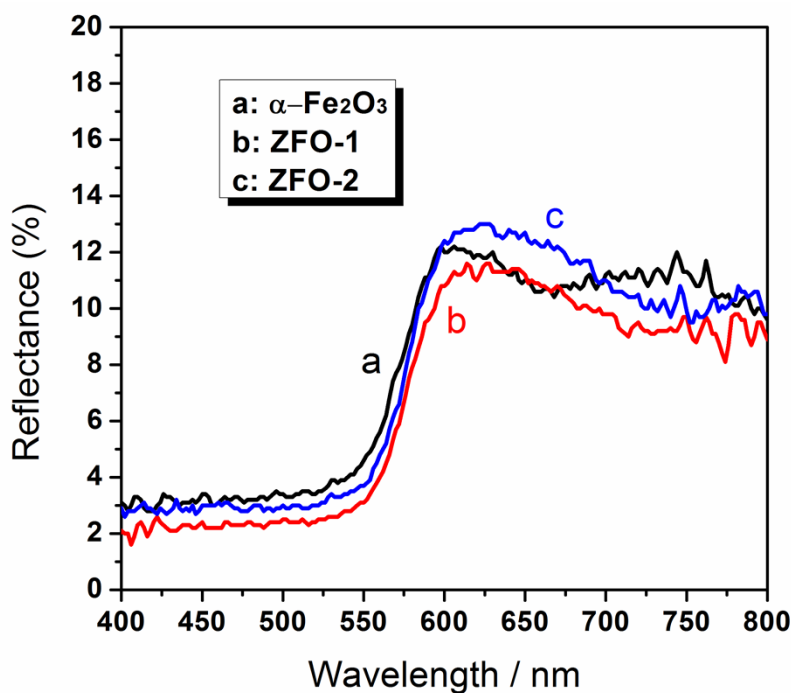

Fig. S1. Spectral reflectance for pristine  $\alpha\text{-Fe}_2\text{O}_3$  and  $\text{ZnFe}_2\text{O}_4$  modified  $\alpha\text{-Fe}_2\text{O}_3$  (ZFO-1 and ZFO-2) nanorod films.

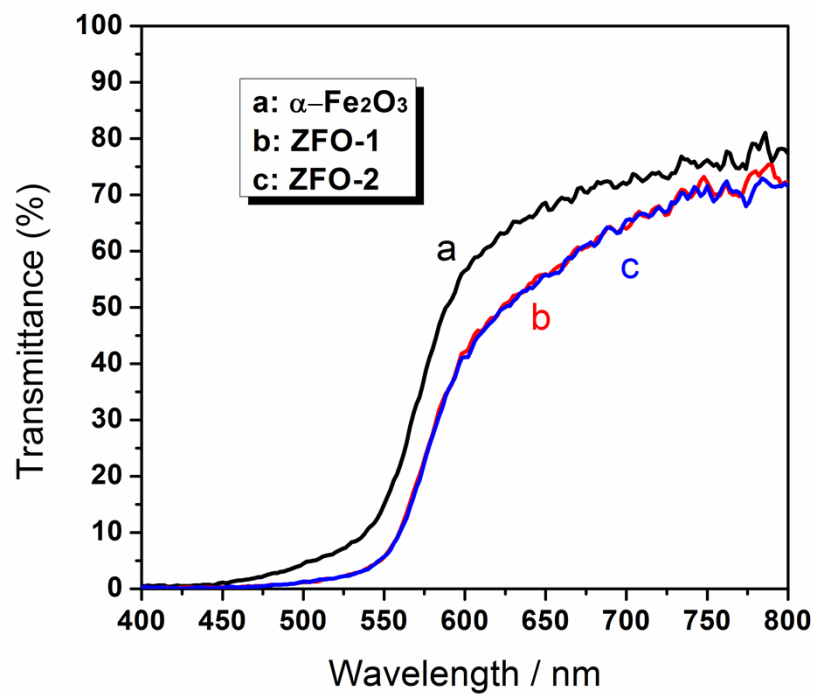

Fig. S2. Spectral transmittance for pristine  $\alpha\text{-Fe}_2\text{O}_3$  and  $\text{ZnFe}_2\text{O}_4$  modified  $\alpha\text{-Fe}_2\text{O}_3$  (ZFO-1 and ZFO-2) nanorod films.

The band gap can be determined from transmittance and reflectance spectra using the Tauc plot method as expressed in equation (1).<sup>1</sup>

$$\alpha h\nu = C(h\nu - E_g)^n \quad (1)$$

where  $\alpha$  is the absorption coefficient,  $h\nu$  the photon energy,  $C$  the photon energy dependent constant, and  $E_g$  the band gap energy. Exponent  $n$  takes 1/2 and 2 for direct and indirect optical transition, respectively. In addition, the absorption coefficient  $\alpha$  can be expressed by equation (2).<sup>2</sup>

$$\alpha d = \ln(T/(1 - R)^2) \quad (2)$$

where  $d$ ,  $T$  and  $R$  represent the thickness, transmittance, and reflectance of the films, respectively. Exponent  $n$  takes 2 because  $\alpha\text{-Fe}_2\text{O}_3$  is an indirect optical transition material. Fig. S3 shows the  $(\alpha h\nu)^{1/2}$  versus photon energy plot.

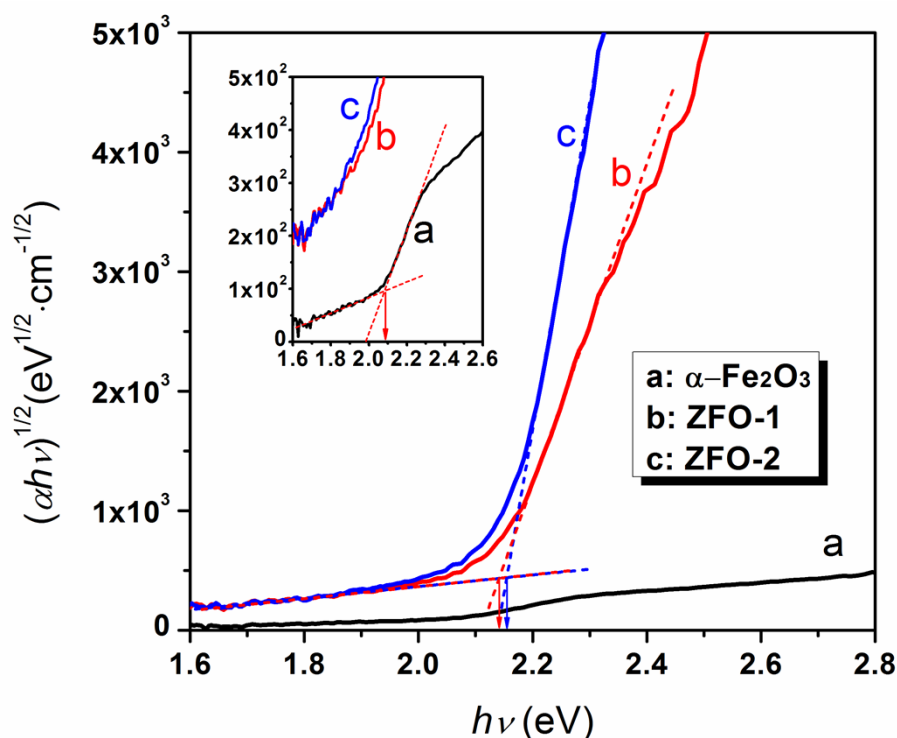

Fig. S3. Plots of  $(\alpha h\nu)^{1/2}$  versus photon energy of pristine  $\alpha\text{-Fe}_2\text{O}_3$  and  $\text{ZnFe}_2\text{O}_4$  modified  $\alpha\text{-Fe}_2\text{O}_3$  (ZFO-1 and ZFO-2) nanorod films.

#### References

1. J.-W. Lee, J.-H. Im and N.-G. Park, *Nanoscale*, 2012, 4, 6642–6648.
2. R. Bhattacharya, *J. Electrochem. Soc.*, 1983, 130, 2040–2042.
